# Supplementary material for: Targeted metabolomics study of serum bile acid profile in patients with end-stage renal disease undergoing hemodialysis
Source: PeerJ. 2019 Jun 17;7:e7145. doi: 10.7717/peerj.7145 (PMC6585905; doi:10.7717/peerj.7145)
Supplement: Supplemental Information 3 [file peerj-07-7145-s003.xlsx]

## Sheet: Sheet1
Demographic and clinical characteristics of ESRD and control group
	ESRD 1	ESRD 2	ESRD 3	ESRD 4	ESRD 5	ESRD 6	ESRD 7	ESRD 8	ESRD 9	ESRD 10	ESRD 11	ESRD 12	ESRD 13	ESRD 14	ESRD 15	ESRD 16	ESRD 17	ESRD 18	ESRD 19	ESRD 20	ESRD 21	ESRD 22	ESRD 23	ESRD 24	ESRD 25	ESRD 26	ESRD 27	ESRD 28	ESRD 29	ESRD 30	ESRD 31	ESRD 32	ESRD 33	ESRD 34	ESRD 35	ESRD 36	ESRD 37	ESRD 38	ESRD 39	ESRD 40	ESRD 41	ESRD 42	ESRD 43	ESRD 44	ESRD 45	ESRD 46	ESRD 47	ESRD 48	ESRD 49
Sex（M/F）	M	M	F	F	F	M	F	F	M	M	M	M	M	M	F	M	M	M	F	F	M	M	M	F	F	M	F	M	F	F	M	M	M	F	F	M	F	F	M	M	M	M	F	M	F	F	F	M	M
Age（year）	48	67	66	54	63	58	73	40	53	51	65	35	40	65	62	33	83	53	65	36	44	62	49	43	58	46	82	44	74	65	63	87	63	78	83	68	60	56	66	70	65	78	75	66	80	64	80	48	67
height(cm)	174	178	158	155	162	168	149	152	165	173	170	160	180	158	160	172	160	170	150	162	164	176	170	163	151	163	145	164	158	156	170	178	165	150	150	165	160	156	170	172	165	160	155	165	150	158	150	174	178
weight（kg）	57	76.5	61.7	54.7	67.2	64.2	42.5	60.6	67	64.2	86.6	48.3	97.8	65	60	58.8	61	74	58	67	68	84	70	54	61.3	61.4	41.1	59	66.3	45.5	73.8	55.1	48.6	54.6	51	65.5	58	42.1	68.2	61.7	72.4	44.2	45.5	69	46	47.5	49	55.4	68.2
BMIkgm2	18.83	24.14	24.72	22.77	25.61	22.75	19.14	26.23	24.61	21.45	29.97	18.87	30.19	26.04	23.44	19.88	23.83	25.61	25.78	25.53	25.28	27.12	24.22	20.32	26.88	23.11	19.55	21.94	26.56	18.7	25.54	17.39	17.85	24.27	22.67	24.06	22.66	17.3	23.6	20.86	26.59	17.27	18.94	25.34	20.44	19.03	21.78	18.3	21.47
PTH（pgml）	411.8	414.3	163	131.2		83.85	48	795.2	317.8	240.9	158	175.7	2971.3	426.3	64.6	695.7	14.6	63.9	196	241.1	176.8	71.3	320.5	396.7	20.7	165.1	401.2		40.5	256.1	125.8	65.1	56.8	576.3	116.5	212.9	61.5	268.8	341.4	86.1	1453.1	114.1	135.6	215.6	197.3	3	64.5	193.5	246.25
CREA（umol/L）	1044.5	929.8	615.2	1098.1		727.7	525.3	949.6	956.2	1198.9	1644	949.9	1016.4	1156.8	815.6	1153.7	1006.4	494.7	391	746.9	1555.6	1017.4		616.4	1083.6	986.2	556.1	1177	1227.7	659.3	539.1	699.6	893.2	897.8	782.2	554.9	950.7	635.1	1001.9	410.6	703.4	915.9	576.6	1012.4	458.7	934.2	463.2	1178	884.2
BUN（mmol/L）	23.43	27.13	18.78	16.77		17.15	13.02	12.1	17.35	20.95	30.3	19.28	17.7	29.74	21.96	23.16	22.44	26.98	18.78	16.36	32.36	24.31		22.49	27.76	22.73	17.02	29.16	29.89	20.37	26.66	18.18	16.12	33.8	31.88	10.6	18.63	18.8	29.33	13.99	15.91	18.92	12.85	32.4	26.39	24.96	14.72	34.41	25.11
UA（ummol/L）	425.3	423.3	384	513.2		387.7	224.3	415.2	494.4	415.4	499.4	482.2	530.3	382.9	425	584.5	402.5	504.2	430.7	411.8	577.3	180.9		497.1	560.8	568.1	288.2	568.9	454.6	400.2	347.9	330.7	415.7	739.4	502.3	318.1	386.9	361.7	492.7	388	465.7	636.4	400.7	503.9	343.8	508.4	377.7	530.4	476.2
Ca（mmol/L）	2.08	2.21	2.25	2.26		2.05	2.34	2.26	1.85	2.32	2.11	2.25	2.43	1.87	2.29	2.15	2.41	2.06	2.22	2.16	2.16	2.15		2.08	2.38	1.95	2.14	1.88	2.35	1.89	1.86	2.28	2.36	2.23	2.27	1.88	2.1	1.53	2.22	1.98	2.43	2.13	2.23	2.12	2.03	2.74	2.28	2.08	2.33
P（mmol/L）	1.89	1.52	1.42	1.94		1.55	0.91	1.43	1.21	2	1.76	1.65	1.96	2.12	1.98	1.93	2.34	1.58	1.32	1.45	1.33	2		1.12	1.81	1.98	1.15	2.19	2.88	2.14	1.45	1.33	1.44	2.65	1.11	0.92	1.75	1.24	1.55	0.73	1.55	2.09	1.09	2.6	2	2.11	1.02	2.13	2.32
TG（mmol/L）	2.3	0.69	3.32			1.85	1.62	4.74	6.34	4.07	2.51	1.91	2.45	0.73	2.03	1.88	1.45	1.51	0.93	4.63	0.84	2.03		1.15	2.15	1.67	1.14	0.92	3	1.91	1.01	1.82	1.59	3.84	2.51	2.6	0.93	1.29	1.64		1.28	0.89	4.04	4.03	1.62	2.21	2.14	1.58	0.66
CHOL(mmol/L)	4.38	2.82	5.15			4.05	4.03	5.74	3.88	4.5	3.61	2.71	3.97	3.59	4.3	4.03	3.95	3.23	3.09	3.69	3.31	2.33		3.44	4.72	2.43	4.86	4.55	5.03	4.03	2.4	3.94	4.48	5.47	3.36	2.85	3.95	2.95	2.69		2.9	4.76	3.28	5.28	3.64	2.25	4.88	3.81	2.99
HDL-C(mmol/L)	0.76	1.21	1.09			0.85	1.94	1.09	0.68	0.71	0.79	0.6	0.67	1.11	0.99	0.79	0.98	1.21	1.36	0.63	0.9	0.28		1.03	1.17	0.76	2.27	1.66	0.74	0.92	1.21	1.36	1.28	1.01	0.61	0.59	1.14	1.29	0.69		0.95	1.41	0.65	0.81	1.93	0.69	1.01	0.72	1.15
LDL-C(mmol/L)	2.57	1.3	2.55			2.02	1.35	2.5	2.86	1.94	1.69	1.24	2.19	2.15	2.39	2.39	2.31	1.33	1.31	3.96	2.03	1.13		1.89	2.57	2.91	1.63	2.02	2.93	2.24	0.73	1.75	2.48	2.71	1.61	1.08	2.39	1.07	1.25		1.37	2.95	0.79	2.64	0.97	0.56	2.9	2.37	1.54
WBC(10^9/L)		4.71	4.21	8.29		6.32		5.18	4.46	7.78	6.49	8.4	5.15	5.73		5.9	5.1		3.69	4.59	6.68				4.56	3.64	5.55			5.53	6.72	5.49	6.28	7.45	5.22	8.36	7.23	3.64	6.62	3.26	7.24		2.43	7.41	3.98	4.05	5.4	8.89	5.33
HGB(g/L)		114	112	122		106		125	91	121	90	118	88	127		140	128		108	83	97				129	112	128			111	83	103	106	146	98	116	106	109	119	86	108		71	141	105	75	89	132	118
PLT(10^9/L)		197	138	177		135		291	117	369	151	221	95	151		208	125		100	161	151				234	126	130			155	79	178	313	162	235	175	40	109	142	74	205		120	133	94	52	196	181	158
GLU（mmol/L）	3.67	3.9	4.24	5.56	5.63	8.66	6.28	6.81	5.13	5.15	8.52		3.19	6.43	21.38	4.45	10.58			4.58	4.35	3.68	3.98	6.96	5.71	5.78	5.2	6.06	4.2	3.92	7.34	7.29	7.41		7.22	10.42	5.78	7.54	4.45	12.03	3.21	7.07	3.55	9.95	6.49		3.68	5.56	3.44
ALB（g/L）	41.7	40.6	42.8	40.7	38.1	32.3	40.3	39.1	31.4	43	46.5		37.4	39.4	32.2	41	37.2	30.8	44.3	38.5	45.1	36.5	42	38.8	33.9	34.8	39.5	38.2	36.4	44.7	37.7	40.7	40.3	42.1	34.9	39.6	35.8	33.4	37.3	42.2	32.9	36	39.6	42.9	41.5	41.4	34.3	39.2	37.7
AST（U/L）	12	13	20	8	18	8	13	25	12	12	8		6	11	18	17	24	24	11	15	27	8	13	8	11	22	32	24	12	21	21	16	16	36	26	15	25	19	10	15	25	49	29	14	12	43	10	13	28
ALT（U/L）	4	8	15	14	24	4	6	15	14	5	10		10	9	7	14	15	16	5	14	13	7	8	28	3	27	23	20	11	22	8	11	12	37	11	12	15	23	10	10	16	30	7	11	4	30	6	11	7
ALP(U/L)	120	63	84	59		65	78		135		124		145	81	25	248	86	97	59	97	153	62	69	49	64	51	176	126	45	112	124	69	99	82	95	122	76	105	110	107	176	211	70	69	126	232	49	77	70
TBIL(umol/L)	3.3	5.7	5.4	9.5	5	6.3	5	5.8	6.3	8	5.4		5	5.3	8.1	6	7.8	7.2	10.8	2.8	8.4	4	6.4	5.5	7.1	5.5	8.8	5.8	6.9	7.1	4.1	12.7	7.2	6.6	8.5	6.1	4.9	10.6	7	5.2	5.8	7.9	10.7	5.7	6.6	7.3	6.2	6.9	20.2
DBIL(umol/L)	1.4	3	3.8	3.9	5	4.3	2.5	3.5	2.8	4	3.6		3	1.8	1.9	4	3.2	3.3	5	2.6	2.9	2	3.9	3	4.1	3.9	4.7	1.6	2.4	1.9	2.5	5.5	2.8	4.8	5.2	2.1	2	4.3	3.5	1.7	4.2	4.5	4	3.3	4.6	4.1	4.5	2.8	7
[truncated: 58 more columns]
