# Supplementary material for: Targeted metabolomics study of serum bile acid profile in patients with end-stage renal disease undergoing hemodialysis
Source: PeerJ. 2019 Jun 17;7:e7145. doi: 10.7717/peerj.7145 (PMC6585905; doi:10.7717/peerj.7145)
Supplement: Supplemental Information 4 [file peerj-07-7145-s004.xlsx]

## Sheet: Sheet1
Supplementary Data 3 Quantitative data of bile acids
concentration(ng/ml)
	ESRD Survival 1	ESRD Survival 2	ESRD Survival 3	ESRD Survival 4	ESRD Survival 5	ESRD Survival 6	ESRD Survival 7	ESRD Survival 8	ESRD Survival 9	ESRD Survival 10	ESRD Survival 11	ESRD Survival 12	ESRD Survival 13	ESRD Survival 14	ESRD Survival 15	ESRD Survival 16	ESRD Survival 17	ESRD Survival 18	ESRD Survival 19	ESRD Survival 20	ESRD Survival 21	ESRD Survival 22	ESRD Survival 23	ESRD Survival 24	ESRD Survival 25	ESRD Survival 26	ESRD Survival 27	ESRD Survival 28	ESRD Survival 29	ESRD Survival 30	ESRD death 1	ESRD death 2	ESRD death 3	ESRD death 4	ESRD death 5	ESRD death 6	ESRD death 7	ESRD death 8	ESRD death 9	ESRD death 10	ESRD death 11	ESRD death 12	ESRD death 13	ESRD death 14	ESRD death 15	ESRD death 16	ESRD death 17	HC1	HC2
CA	11.4262	10.4962	128.017	14.2519	18.2323	51.707	67.2961	36.4759	6.27294	17.6258	130.305	31.5013	13.0282	23.843	46.3123	27.35	149.771	14.5205	17.5396	29.0395	31.4862	14.1108	114.381	10.7723	6.95096	44.6177	279.227	70.1155	69.8676	30.4853	28.0748	1099.72	25.9838	26.9535	287.885	104.375	7.43762	43.6391	13.3367	57.6509	30.1053	29.7208	76.053	18.5156	94.9859	56.8717	19.6474	93.3289	119.466
CDCA	120.315	50.6042	128.158	68.0874	130.828	894.755	288.48	60.2457	24.3632	71.3435	347.351	87.614	57.1768	28.588	36.1308	235.432	162.042	22.9522	219.374	67.959	41.5309	87.9589	216.824	50.1208	19.5453	186.651	752.902	77.3646	565.929	96.5153	59.7744	1155.66	26.4405	117.236	217.785	799.761	8.98333	91.2708	41.025	29.3894	43.6273	121.542	147.649	70.8144	419.845	24.1545	22.244	565.992	80.7327
DCA	2.01277	50.1196	25.0702	18.8011	71.4334	9.22768	0.765606	1.63218	140.8	1.32376	231.806	21.3189	3.02269	333.463	1.04992	99.1586	62.3755	68.0013	40.2348	39.5313	1.61815	33.909	0.685934	139.381	73.4244	2.01328	141.446	74.6541	101.129	6.29373	175.481	229.885	30.3811	32.4128	25.6338	105.414	3.71561	58.1324	1.98264	3.32992	8.51959	16.3912	17.015	68.1616	366.889	6.97339	57.2087	100.937	122.794
HDCA	1.81599	4.82614	4.24039	0	7.24768	0	0	0.732712	7.09608	0	8.81108	1.60472	0.572204	40.2458	0	5.57795	10.062	6.97125	1.74494	3.93234	0.833017	4.18388	0	21.4566	13.2202	0	7.27596	6.04889	2.07123	2.03995	5.94753	14.0167	3.87488	11.9476	1.31622	0.872203	1.29461	9.99155	1.40068	4.00357	9.5419	40.1482	4.84164	2.69639	26.7526	1.91315	2.59383	1.25264	13.6629
LCA	1.70172	13.3884	1.95643	1.61488	3.712	2.70533	1.67015	1.5179	6.12172	1.51584	3.14048	1.80173	2.29862	12.3447	2.37456	4.83472	2.43767	3.35158	3.31543	2.42112	1.56189	3.59451	2.3607	7.73439	6.50187	0	0	3.40723	3.64567	1.52818	4.99153	4.68124	3.2809	2.35028	1.77428	2.13503	2.60922	3.43043	1.61675	1.42699	2.16184	3.08357	1.67989	2.00556	4.37891	0	2.95998	4.80938	6.1743
UDCA	45.6539	3.07509	9.82284	20.1523	7.72565	186.517	62.9809	10.7411	2.96232	8.99699	54.0331	14.6611	12.9122	2.65831	3.64853	30.0596	26.1939	7.00624	26.1294	13.0943	2.39794	17.1438	9.17278	4.59579	2.43348	21.0012	31.3195	6.63414	25.6315	9.46223	40.3056	68.9759	4.16397	17.717	11.6177	24.1074	0.832807	7.14528	7.37483	0.4357	1.99962	10.8266	70.2279	12.5534	63.9794	10.7927	5.28375	15.5464	0.724763
α+ωMCA	0	0	0	5.3353	1.22169	29.1577	21.3011	15.4728	0.60539	3.42868	98.8439	1.21211	0.248406	4.32759	0	2.10846	13.3897	3.65749	0.476274	3.6454	3.53413	0	4.71582	2.62874	0.509749	14.2802	8.04287	0	0.736751	1.47561	9.22869	153.455	0.479103	24.6724	15.2015	6.28815	0.26263	5.75243	3.4463	3.19121	7.64115	4.3859	12.0776	4.24155	33.8411	1.31728	1.94716	5.00719	2.22898
βMCA	11.5803	0.863926	0	4.98518	1.18477	0	0	0	0	0	0	1.8761	1.29787	3.36591	0	2.70143	7.54053	0	0.760796	0	1.63068	7.41528	0	1.55274	0	0	3.80943	0	3.51167	0.753246	1.42817	0	0	0	0	0	1.28052	0	2.35725	9.30715	12.6013	3.33188	66.2407	1.391	0	2.69987	2.89258	0	0
γMCA	12.268	30.9469	118.996	2.51988	5.50608	17.4415	2.75546	1.9459	1.67382	10.0957	4.69335	3.33401	11.9301	17.4263	1.98508	18.4148	12.1995	14.3198	15.7748	13.7289	1.50699	120.166	13.8775	25.3189	202.371	18.1255	37.5842	3.00778	10.9518	29.4853	13.074	51.6343	4.80897	18.3276	4.65848	5.10197	5.41078	8.92801	2.3628	2.07467	1.95192	36.1052	9.08723	4.50731	18.8166	1.7893	2.03334	25.2194	2.61699
7KLCA	10.0076	3.29596	3.1608	5.86638	2.7447	23.7318	19.3741	4.15455	0	2.33288	37.4833	5.01145	4.49062	0	2.34694	13.035	7.43169	3.02597	13.7446	3.57724	3.23707	7.53574	4.09739	3.26651	3.89175	7.52413	15.7381	2.81273	4.51757	5.56797	4.4214	42.0633	1.807	4.33931	3.6044	13.9254	0	3.17707	3.97061	0	10.8823	5.45822	13.8038	11.0516	17.8938	2.64289	2.28133	8.03573	2.34764
12KLCA	0	4.66688	2.43468	0	3.90249	0	0	0	5.77482	2.10014	4.29091	0	0	23.0554	0	3.17462	4.52139	4.35374	3.24931	2.70813	0	2.39367	0	12.9425	4.70139	0	5.10994	4.6377	3.26663	0	5.41546	7.54641	2.26115	2.73276	0	3.01529	0	2.98288	0	0	3.28187	0	0	2.58207	6.21299	0	0	0	9.95604
6,7-diketoLCA	0	6.90817	4.20603	0	0	4.92211	1.65876	0	0	0	0	0	4.63545	0	0	4.02653	0	7.52267	6.3097	0	2.98222	0	4.00935	3.2976	5.54373	1.7994	2.28899	0	3.66776	4.34914	4.54645	2.43622	3.7314	9.41876	11.005	3.43452	2.58398	0	0	3.30007	3.48217	5.52545	4.18886	0	0	5.7682	1.08922	5.86668	0
GCA	46.5825	325.058	212.64	255.51	129.638	154.819	543.962	1897.38	231.352	54.208	597.928	306.026	270.155	393.763	98.6139	485.822	954.113	141.286	239.267	387.722	346.381	99.9318	2261.3	207.564	46.92	143.598	323.335	191.109	280.261	420.34	1241.15	473.877	453.224	59.0527	342.644	728.703	52.4652	102.275	441.603	3309.96	141.675	1346.17	47.6554	548.22	601.019	1143.94	243.042	81.8026	327.264
GCDCA	531.672	1129.78	897.004	1137.99	437.116	1244.78	1890.41	5883.61	1155.8	479.159	2686.38	564.846	1355.81	838.414	160.133	1991.85	1949.39	431.246	1051.9	1193.83	1636.26	608.143	3530.03	1205.99	290.096	511.184	1003.04	719.202	638.5	1638.46	4748.09	1897.79	1185.71	334.592	699.393	4250.79	269.726	488.318	1560.95	3584.61	838.267	3090.98	328.82	2488.35	1624.47	2058.6	475.865	355.787	679.489
GDCA	2.40359	99.6404	44.8416	125.682	106.629	6.67055	0	0	253.819	1.61524	473.329	33.9979	0	949.641	1.32508	194.29	227.937	129.111	100.968	125.904	4.33187	48.105	5.60804	450.77	101.256	0	136.524	216.785	135.736	25.7777	717.444	158.532	183.643	17.242	32.8575	329.849	4.73701	86.5545	0	0	0	165.256	16.7918	738.703	674.019	10.1644	169.996	25.3618	292.833
GHCA	7.97253	18.8366	15.1721	15.5463	12.1568	12.9374	8.34003	19.0355	7.88133	4.41238	6.21989	6.54623	6.09464	17.9829	10.9525	91.2918	28.155	6.06693	6.42395	7.63978	11.918	4.43484	17.1707	14.9788	9.5856	7.38431	17.947	7.95601	8.25734	21.5302	42.2395	11.9118	14.8309	10.5625	6.74548	8.00077	8.42984	10.7208	17.8084	57.7796	12.8605	369.122	3.66853	10.4512	19.4363	16.4291	14.0413	9.61147	10.6167
GLCA	0	6.75739	0	1.12672	1.48892	0	0	0	11.5886	0	4.15999	0	0	13.1237	0	2.59107	3.99202	1.04766	1.59939	3.47688	0	3.4549	0	13.9845	6.45456	0	0	2.30072	2.60093	0	4.0106	6.68483	6.73978	1.08978	0	1.34714	0	1.68574	0	0.277661	0	1.09981	0	0	5.23503	0.418572	3.50693	1.4186	2.48491
GUDCA	361.637	62.6697	236.438	558.467	89.5589	1166.35	567.614	811.793	67.6076	121.728	560.098	180.628	265.697	48.0643	67.8397	860.6	908.182	199.434	307.227	348.191	165.931	267.139	469.764	161.751	47.0419	114.279	216.142	136.984	201.646	391.805	1403.97	408.369	240.36	102.155	116.881	306.478	23.7489	71.5395	362.362	15.0803	19.3926	305.28	283.1	349.18	601.512	418.609	159.607	62.467	27.4061
TCA	23.9318	64.2131	34.4586	82.5631	24.9591	17.8355	126.58	236.342	23.606	9.27367	48.1112	44.4269	87.9491	132.9	14.4858	68.3411	496.717	50.5021	64.2308	50.0866	83.172	23.5004	298.75	68.1977	23.5157	19.3604	56.2492	22.7281	65.5524	49.4992	116.641	72.7199	201.227	35.8387	41.3092	40.0483	47.7802	14.0131	81.9257	654.519	82.1825	1592.74	50.9567	294.3	43.2378	251.643	32.7787	7.60491	28.6567
TCDCA	97.4407	168.545	85.0704	226.781	51.3999	47.4636	456.312	508.63	73.4934	18.8111	124.002	84.7498	300.421	207.442	26.0935	224.106	790.184	103.72	220.219	99.8337	304.071	74.2595	363.342	251.534	56.1952	34.2663	149.208	47.3737	88.62	149.286	348.672	175.617	485.014	101.136	34.9107	175.224	220.073	22.0107	252.843	425.257	203.211	2664.56	35.6423	1034.72	88.1463	423.354	34.4685	17.7118	56.9964
TDCA	0	32.4229	7.61228	60.1167	17.1904	1.70703	0	0	26.6799	0.811781	29.3089	7.23323	0	411.502	0.884518	39.6014	123.013	62.5908	24.3271	18.8586	0	13.8237	0	186.732	28.3324	1.88248	24.0164	21.088	23.0376	5.20403	69.0709	19.6121	88.9427	9.22286	3.17062	21.1127	4.2237	7.05756	0	0	2.20197	250.01	4.57614	614.259	38.9136	5.65386	22.2816	2.31971	30.0754
THCA	2.75454	4.3089	4.00222	4.67976	2.43586	1.63515	3.07456	3.75967	1.27754	0	0	3.11046	2.0868	10.4911	2.75318	8.39853	16.8089	3.86379	2.65591	1.56725	4.03589	1.20123	4.32162	9.56468	2.38119	1.32353	4.19218	1.35415	2.80497	3.91507	4.77668	3.9188	10.8802	2.75509	1.47163	1.59443	7.0218	1.29111	3.2481	10.4048	3.41913	414.847	1.51187	10.0277	1.79357	7.035	1.30367	1.39796	2.39853
TαMCA	2.24582	1.63252	1.13023	1.62656	0.963304	0.638798	1.03502	1.74139	0.000624301	1.025	5.2843	2.37884	2.07227	6.74103	0.948017	5.45111	9.6753	2.18102	2.3096	0.959094	3.95083	1.73401	2.56613	4.67009	1.34137	0.662211	4.91628	0.801963	5.29332	3.04326	2.98465	7.19737	4.31267	2.29813	1.46521	1.01517	3.7227	1.05409	1.82245	8.29789	4.78786	40.2914	8.28755	3.7066	0.909867	3.20754	1.80405	0	1.06198
TβMCA	9.34511	8.64701	6.38907	13.2058	9.66262	4.53193	5.53459	11.4951	6.06573	4.09841	16.8748	7.07747	6.35999	65.9849	4.79046	9.56848	27.4413	8.20263	8.89074	5.69179	19.4078	11.615	5.19968	21.5058	10.026	7.15676	15.186	6.65257	29.3473	6.96915	11.3542	20.2554	14.3656	5.38278	10.7592	6.41823	7.16214	6.52522	12.9414	48.7825	36.0039	218.483	42.7782	14.9175	15.3019	10.8673	13.6019	3.81601	9.48485
TUDCA	32.8843	7.1576	12.0666	81.2622	5.77059	32.1564	76.3861	41.6293	4.03965	3.84368	16.9975	13.143	33.5744	7.64965	7.03037	49.4502	172.88	23.7354	39.5267	22.093	16.5749	18.9369	32.3775	17.5519	5.9362	6.25374	19.6128	5.80154	18.4263	25.7391	66.3428	32.3705	50.8019	14.8212	5.72528	11.1575	9.3763	2.62151	37.659	4.5245	5.39604	181.53	24.442	115.219	18.9291	58.6446	7.11752	2.54708	3.24742
[truncated: 28 more columns]
